# Supplementary material for: Faster Smith-Waterman database searches with inter-sequence SIMD parallelisation
Source: Springer Nature journal article supplement (doi:10.1186/1471-2105-12-221), 2011-06-01
Supplement: 12859_2011_4572_MOESM4_ESM.pdf [file 12859_2011_4572_MOESM4_ESM.pdf]

|        |       |   |    |               |
|--------|-------|---|----|---------------|
| paddsb | P[q], | H | // | H = H + P[q]  |
| pmaxub | F,    | H | // | H = max(H, F) |
| pmaxub | E,    | H | // | H = max(H, E) |
| pmaxub | H,    | S | // | S = max(S, H) |
| psubsb | R,    | F | // | F = F - R     |
| psubsb | R,    | E | // | E = E - R     |
| movdqa | H,    | N | // | N = H         |
| psubsb | Q,    | H | // | H = H - Q     |
| pmaxub | H,    | E | // | E = max(H, E) |
| pmaxub | H,    | F | // | F = max(H, F) |
