# Supplementary material for: Faster Smith-Waterman database searches with inter-sequence SIMD parallelisation
Source: Springer Nature journal article supplement (doi:10.1186/1471-2105-12-221), 2011-06-01

A

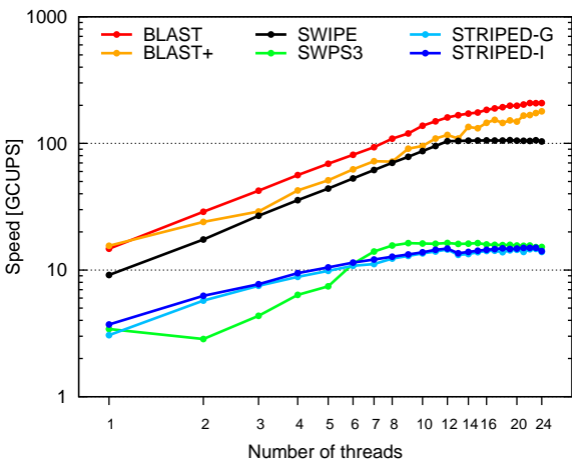

B

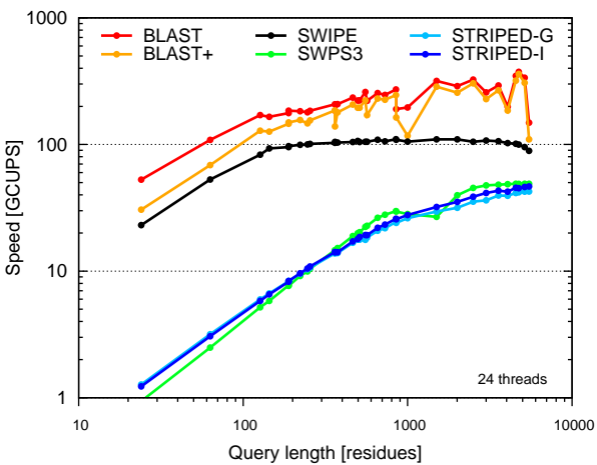

C

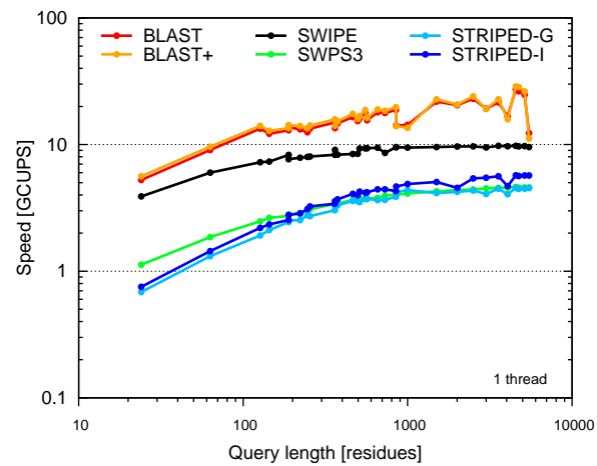

Supplement: 12859_2011_4572_MOESM7_ESM.pdf [file 12859_2011_4572_MOESM7_ESM.pdf]
