# Supplementary material for: Faster Smith-Waterman database searches with inter-sequence SIMD parallelisation
Source: Springer Nature journal article supplement (doi:10.1186/1471-2105-12-221), 2011-06-01

BLOSUM45

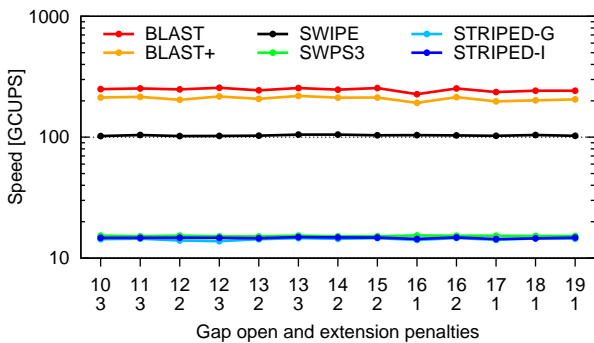

BLOSUM50

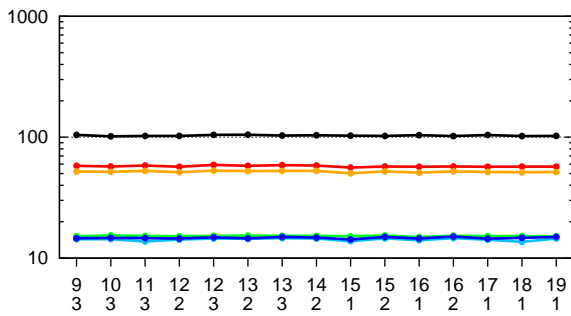

BLOSUM62

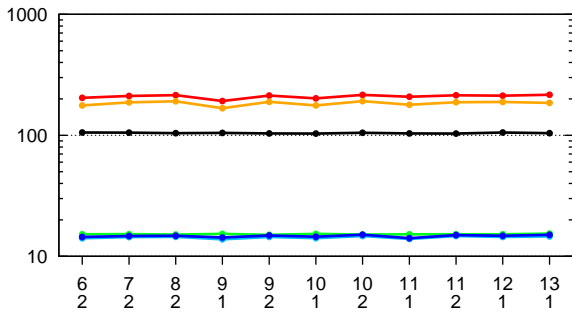

BLOSUM80

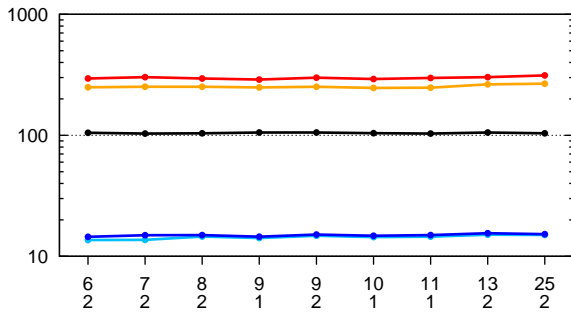

BLOSUM90

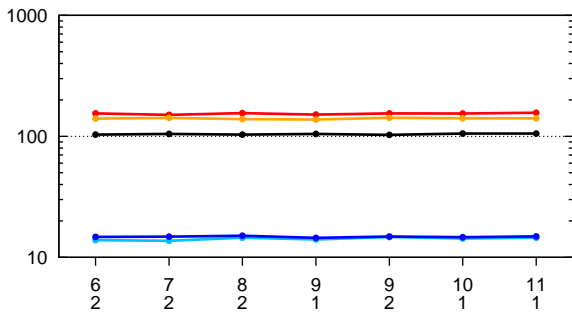

PAM30

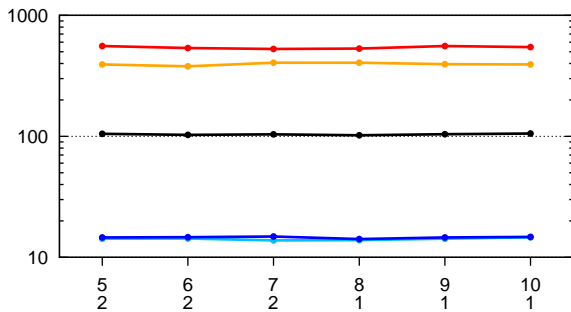

PAM70

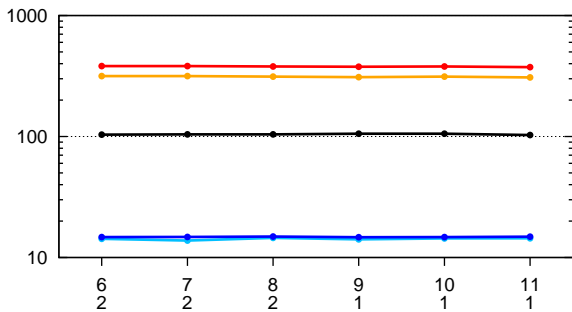

PAM250

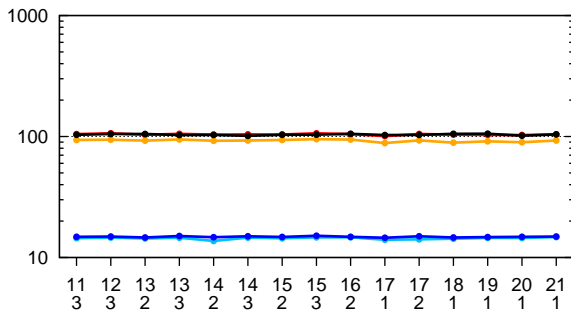

Supplement: 12859_2011_4572_MOESM8_ESM.pdf [file 12859_2011_4572_MOESM8_ESM.pdf]
